# Supplementary material
Source: Springer Nature journal article supplement (https://www.springermedizin.de/resource/supplementary/12916_2013_910_MOESM2_ESM.pdf/9598806)
Supplement: MOESM2 [file 9598806]

**Additional file 2 - Summary characteristics of reviewed validation studies**

| No. | Setting                                  | Period    | Age group              | Sample size | Causes of death    | Interpretation method | Performance measures                                                                                                                                                                                | Reference standard       |
|-----|------------------------------------------|-----------|------------------------|-------------|--------------------|-----------------------|-----------------------------------------------------------------------------------------------------------------------------------------------------------------------------------------------------|--------------------------|
| 1   | Tanzania [28]                            | 2000-2003 | All                    | 3123        | All                | PCVA                  | <ul style="list-style-type: none"> <li>• Sensitivity</li> <li>• Specificity</li> <li>• Agreement of CSMF</li> <li>• PPV</li> </ul>                                                                  | Hospital-based deaths    |
| 2   | China [29]                               | 2002      | Adult                  | 2102        | All                | PCVA                  | <ul style="list-style-type: none"> <li>• Sensitivity</li> <li>• Specificity</li> <li>• Agreement of CSMF</li> <li>• PPV</li> </ul>                                                                  | Hospital-based deaths    |
| 3   | Thailand [30]                            | 2006-2007 | Adolescents and adults | 2 558       | All                | PCVA                  | <ul style="list-style-type: none"> <li>• Sensitivity</li> <li>• PPV</li> <li>• Agreement of CSMF</li> </ul>                                                                                         | Hospital-based deaths    |
| 4   | Mexico, Tanzania, India Philippines [31] | 2005      | All                    | 12 542      | All                | PCVA                  | <ul style="list-style-type: none"> <li>• Average of cause-specific chance-corrected concordance</li> <li>• CSMFs accuracy</li> <li>• Relationship between estimated CSMFs and true CSMFs</li> </ul> | Hospital-based deaths    |
| 5   | India [32]                               | 1998-1999 | Adults                 | 48 357      | All                | PCVA                  | <ul style="list-style-type: none"> <li>• Agreement of CSMF</li> <li>• Sensitivity (only for cancer)</li> </ul>                                                                                      | Death certificates       |
| 6   | India [33]                               | 1997-1998 | Adults                 | 31 788      | All                | PCVA                  | <ul style="list-style-type: none"> <li>• Agreement of CSMF</li> </ul>                                                                                                                               | Various types of records |
| 7   | Uganda                                   | 2006-     | Adults                 | 264         | HIV –related death | PCVA                  | <ul style="list-style-type: none"> <li>• Specificity</li> </ul>                                                                                                                                     | Clinically-              |

| No. | Setting                                         | Period    | Age group        | Sample size | Causes of death          | Interpretation method | Performance measures                                                                                                                                                                 | Reference standard    |
|-----|-------------------------------------------------|-----------|------------------|-------------|--------------------------|-----------------------|--------------------------------------------------------------------------------------------------------------------------------------------------------------------------------------|-----------------------|
|     | 34]                                             | 2008      |                  |             |                          |                       | <ul style="list-style-type: none"> <li>• Agreement of CSMF</li> <li>• PPV</li> </ul>                                                                                                 | confirmed HIV status  |
| 8   | Uganda [35]                                     | 2008-2009 | Children under 5 | 719         | Malaria                  | PCVA                  | <ul style="list-style-type: none"> <li>• Sensitivity</li> <li>• Specificity</li> <li>• PPV</li> <li>• Agreement of CSMF</li> </ul>                                                   | Hospital-based deaths |
| 9   | Kenya [36]                                      | 2002-2008 | All              | 1 823       | All                      | InterVA-3             | <ul style="list-style-type: none"> <li>• Kappa statistics</li> <li>• Agreement of CSMF</li> </ul>                                                                                    | PCVA                  |
| 10  | Burkina Faso [37]                               | 1998-2007 | All              | 5649        | All                      | InterVA-3             | <ul style="list-style-type: none"> <li>• Agreement of CSMF</li> </ul>                                                                                                                | PCVA                  |
| 11  | Mexico<br>Tanzania<br>India<br>Philippines [14] | 2005      | All              | 12 542      | All                      | InterVA-3             | <ul style="list-style-type: none"> <li>• Chance-corrected concordance</li> <li>• CSMFs accuracy</li> <li>• Linear regression</li> </ul>                                              | Hospital-based deaths |
| 12  | South Africa [15]                               | 1992-2005 | All              | 1 000       | All                      | InterVA               | <ul style="list-style-type: none"> <li>• Agreement of CSMF</li> </ul>                                                                                                                | InterVA-3             |
| 13  | South Africa [38]                               | 1992-2005 | All              | 6,153       | All                      | InterVA-3             | <ul style="list-style-type: none"> <li>• Agreement of CSMF</li> </ul>                                                                                                                | PCVA                  |
| 14  | Ethiopia [39]                                   | 2003      | Adults           | 193         | HIV/AIDS<br>HIV/AIDS+ TB | InterVA-3             | <ul style="list-style-type: none"> <li>• Sensitivity</li> <li>• Specificity</li> <li>• PPV</li> <li>• Agreement of CSMF</li> <li>• Kappa statistics</li> <li>• ROC curves</li> </ul> | Hospital-based deaths |

| No. | Setting                                            | Period | Age group | Sample size | Causes of death        | Interpretation method | Performance measures                                                                                                                                                                                | Reference standard    |
|-----|----------------------------------------------------|--------|-----------|-------------|------------------------|-----------------------|-----------------------------------------------------------------------------------------------------------------------------------------------------------------------------------------------------|-----------------------|
| 15  | Ethiopia<br>[40]                                   | 2012   | Adults    | 408         | Pulmonary tuberculosis | InterVA-3             | <ul style="list-style-type: none"> <li>• Sensitivity</li> <li>• Specificity</li> <li>• Agreement of CSMF</li> <li>• Kappa statistics</li> <li>• Receiver operating characteristic curves</li> </ul> | PCVA                  |
| 16  | Mexico<br>Tanzania<br>India<br>Philippines<br>[16] | 2005   | All       | 12 542      | All                    | KL                    | <ul style="list-style-type: none"> <li>• CSMF accuracy</li> <li>• Linear regression</li> </ul>                                                                                                      | Hospital-based deaths |
| 17  | Mexico<br>Tanzania<br>India<br>Philippines<br>[12] | 2005   | All       | 12 542      | All                    | Tariff                | <ul style="list-style-type: none"> <li>• Chance-corrected concordance</li> <li>• CSMF accuracy</li> <li>• Linear regression</li> </ul>                                                              | Hospital-based deaths |
| 18  | Mexico<br>Tanzania<br>India<br>Philippines<br>[13] | 2005   | All       | 12 542      | All                    | SSP                   | <ul style="list-style-type: none"> <li>• Chance-corrected concordance</li> <li>• CSMF accuracy</li> <li>• Linear regression</li> </ul>                                                              | Hospital-based deaths |
| 19  | Mexico<br>Tanzania<br>India<br>Philippines<br>[11] | 2005   | All       | 12 542      | All                    | RF                    | <ul style="list-style-type: none"> <li>• Chance-corrected concordance</li> <li>• CSMF accuracy</li> <li>• Linear regression</li> </ul>                                                              | Hospital-based deaths |
